# Supplementary material
Source: publisher figshare collection journal article supplement (https://frontiersin.figshare.com/ndownloader/files/26790023)
Supplement: Supplementary file 1 [file 26790023]

# Supplementary Materials

**SM Table 1.** Number of stakeholders engaged via interviews (I) and workshops (W) in each jurisdiction.

| State/  Province | Country | Government | | | NGO/  CSO | | Academic/  Research | | | Indigenous organization | | | Multi-stakeholder council/org | | | Multi-/bi-lateral org. | | Private sector | | Total | | |
| --- | --- | --- | --- | --- | --- | --- | --- | --- | --- | --- | --- | --- | --- | --- | --- | --- | --- | --- | --- | --- | --- | --- |
|  |  | ***W*** | ***I*** | ***W*** | | ***I*** | | ***W*** | ***I*** | | ***W*** | ***I*** | ***W*** | ***I*** | ***W*** | | ***I*** | ***W*** | ***I*** | | ***W*** | ***I*** |
| *Amazonas* | *Brazil* | 4 | 1 | 3 | | 4 | | 1 | 1 | | 0 | 0 | 0 | 0 | 1 | | 1 | 1 | 0 | | 10 | 8 |
| *Maranhao* | *Brazil* | 4 | 9 | 0 | | 2 | | 0 | 0 | | 0 | 0 | 0 | 0 | 0 | | 0 | 0 | 0 | | 4 | 11 |
| *Rondonia* | *Brazil* | 4 | 6 | 0 | | 3 | | 0 | 0 | | 0 | 0 | 0 | 0 | 0 | | 0 | 0 | 0 | | 4 | 9 |
| *Tocantins* | *Brazil* | 6 | 5 | 0 | | 2 | | 0 | 0 | | 0 | 1 | 0 | 0 | 0 | | 0 | 0 | 0 | | 6 | 8 |
| *Pastaza* | *Ecuador* | 5 | 5 | 1 | | 2 | | 0 | 0 | | 1 | 2 | 1 | 0 | 0 | | 0 | 0 | 0 | | 8 | 9 |
| *Aceh* | *Indonesia* | 10 | 5 | 4 | | 4 | | 1 | 0 | | 0 | 3 | 0 | 1 | 0 | | 0 | 0 | 0 | | 15 | 13 |
| *East Kalimantan* | *Indonesia* | 6 | 8 | 1 | | 4 | | 1 | 1 | | 0 | 0 | 1 | 0 | 1 | | 1 | 1 | 1 | | 11 | 15 |
| *West Kalimantan* | *Indonesia* | 4 | 3 | 6 | | 5 | | 2 | 1 | | 0 | 0 | 0 | 0 | 1 | | 0 | 0 | 1 | | 13 | 11 |
| *Bellier* | *Cote d’Ivoire* | 7 | 4 | 1 | | 0 | | 1 | 0 | | 0 | 0 | 2 | 0 | 0 | | 0 | 0 | 0 | | 11 | 4 |
| *Cavally* | *Cote d’Ivoire* | 5 | 4 | 2 | | 0 | | 1 | 0 | | 0 | 0 | 3 | 0 | 1 | | 0 | 1 | 0 | | 13 | 4 |
| *Campeche* | *Mexico* | 5 | 2 | 4 | | 1 | | 2 | 1 | | 0 | 0 | 2 | 0 | 0 | | 2 | 2 | 0 | | 15 | 6 |
| *Quintana Roo* | *Mexico* | 6 | 8 | 0 | | 2 | | 3 | 1 | | 2 | 2 | 0 | 0 | 1 | | 1 | 4 | 1 | | 16 | 15 |
| *Tabasco* | *Mexico* | 5 | 4 | 1 | | 1 | | 3 | 2 | | 0 | 0 | 0 | 0 | 0 | | 0 | 0 | 1 | | 9 | 8 |
| *Yucatan* | *Mexico* | 8 | 4 | 2 | | 3 | | 2 | 0 | | 0 | 0 | 1 | 0 | 0 | | 2 | 2 | 1 | | 15 | 10 |
| *Amazonas* | *Peru* | 4 | 7 | 1 | | 3 | | 1 | 0 | | 0 | 2 | 0 | 0 | 0 | | 0 | 0 | 0 | | 8 | 6 |
| *Huanuco* | *Peru* | 5 | 5 | 1 | | 2 | | 0 | 0 | | 1 | 0 | 1 | 0 | 0 | | 0 | 1 | 0 | | 7 | 9 |
| *Loreto* | *Peru* | 3 | 2 | 5 | | 3 | | 0 | 0 | | 0 | 1 | 0 | 0 | 0 | | 0 | 0 | 0 | | 6 | 8 |
| *Madre de Dios* | *Peru* | 4 | 2 | 1 | | 5 | | 0 | 1 | | 0 | 0 | 0 | 1 | 0 | | 0 | 0 | 0 | | 9 | 5 |
| *Ucayali* | *Peru* | 5 | 5 | 2 | | 2 | | 0 | 0 | | 0 | 0 | 0 | 0 | 1 | | 1 | 0 | 0 | | 8 | 8 |
